# Supplementary material
Source: PubMed Central journal article supplement (PMC4068567)
Supplement: AAC.02558-14_zac007143036so1.pdf [file AAC.02558-14_zac007143036so1.pdf]

**Supplemental Table 1.** Primers, annealing temperatures and expected amplicon sizes for molecular genotyping of extended-spectrum cephalosporin-resistant *Enterobacteriaceae*.

| Locus <sup>a</sup>            | Primer     | Sequence 5'--->3'        | T <sub>ann</sub> <sup>b</sup> | Amplicon (bp) | Reference  |
|-------------------------------|------------|--------------------------|-------------------------------|---------------|------------|
| <i>bla</i> <sub>CTX-M</sub>   | CTXM-F     | CGATGTGCAGTACCAGTAA      | 57°C                          | 585           | (1)        |
|                               | CTXM-R     | TTAGTGACCAGAATCAGCGG     |                               |               |            |
| <i>bla</i> <sub>CMY</sub>     | CITM-F     | TGGCCAGAACTGACAGGCAAA    | 61°C                          | 461           | (2)        |
|                               | CITM-R     | TTTCTCCTGAACGTGGCTGGC    |                               |               |            |
| <i>bla</i> <sub>DHA</sub>     | DHAM-F     | AACTTTCACAGGTGTGCTGGGT   | 64 °C                         | 405           | (2)        |
|                               | DHAM-R     | CCGTACGCATACTGGCTTTGC    |                               |               |            |
| <i>bla</i> <sub>SHV-all</sub> | SHV-F      | GCCGGGTATTCTTATTTGTCGC   | 59°C                          | 1015          | (3)        |
|                               | SHV-R      | TCTTTCCGATGCCGCCGCCAGTCA |                               |               |            |
| <i>bla</i> <sub>SHV-12</sub>  | SHV-F      | GCCGGGTATTCTTATTTGTCGC   | 57°C                          | 1229          | This study |
|                               | SHV-IS26-R | AGCGGTAAATCGTGGAGTGA     |                               |               |            |
| <i>bla</i> <sub>KPC</sub>     | KPC-F      | CGTCTAGTTCTGCTGTCTTG     | 57°C                          | 798           | (4)        |
|                               | KPC-R      | CTTGTCATCCTTGTTAGGCG     |                               |               |            |

|                           |                |                          |      |     |            |
|---------------------------|----------------|--------------------------|------|-----|------------|
| <i>bla</i> <sub>IMP</sub> | IMP-F          | GGAATAGAGTGGCTTAAYTC     | 57°C | 232 | (4)        |
|                           | IMP-R          | TCGGTTTAAAYAAAACAACCACC  |      |     |            |
| <i>bla</i> <sub>VIM</sub> | VIM-F          | GATGGTGTGGTTCGCATA       | 57°C | 390 | (4)        |
|                           | VIM-R          | CGAATGCGCAGCACCAG        |      |     |            |
| <i>fumC</i>               | <i>fumC</i> -F | TCACAGGTCGCCAGCGCTTC     | 57°C | 806 | (5)        |
|                           | <i>fumC</i> -R | GTACGCAGCGAAAAAGATTC     |      |     |            |
| <i>fimH</i>               | <i>fimH</i> -F | CACTCAGGGAACCATTCAGGCA   | 57°C | 975 | (5)        |
|                           | <i>fimH</i> -R | CTTATTGATAAACAAAAGTCAC   |      |     |            |
| <i>uxuA</i>               | <i>uxuA</i> -F | AGTGTGGCATTTCGCACCGTG    | 57°C | 656 | This study |
|                           | <i>uxuA</i> -R | CGTGGAAGGTTTTTCGGGTTATC  |      |     |            |
| <i>tonB</i>               | <i>tonB</i> -F | CTTTATACCTCGGTACATCAGGTT | 57°C | 414 | (6)        |
|                           | <i>tonB</i> -R | ATTCGCCGGCTGRGCRGAGAG    |      |     |            |

<sup>a</sup> Primers were used for both PCR amplification and for sequencing.

<sup>b</sup> Specified annealing temperatures ( $T_{ann}$ ) were used for amplification with different primer sets.

## References for supplemental table

1. **Batchelor, M., K. L. Hopkins, E. J. Threlfall, F. A. Clifton-Hadley, A. D. Stallwood, R. H. Davies, and E. Liebana.** 2005. Characterization of AmpC-mediated resistance in clinical *Salmonella* isolates recovered from humans during the period 1992 to 2003 in England and Wales. *J Clin Microbiol* **43**:2261-5.
2. **Perez-Perez, F. J., and N. D. Hanson.** 2002. Detection of plasmid-mediated AmpC beta-lactamase genes in clinical isolates by using multiplex PCR. *J Clin Microbiol* **40**:2153-62.
3. **Yan, J. J., S. M. Wu, S. H. Tsai, J. J. Wu, and I. J. Su.** 2000. Prevalence of SHV-12 among clinical isolates of *Klebsiella pneumoniae* producing extended-spectrum beta-lactamases and identification of a novel AmpC enzyme (CMY-8) in Southern Taiwan. *Antimicrob Agents Chemother* **44**:1438-42.
4. **Nordmann, P., T. Naas, and L. Poirel.** 2011. Global spread of Carbapenemase-producing Enterobacteriaceae. *Emerg Infect Dis* **17**:1791-8.
5. **Weissman, S. J., J. R. Johnson, V. Tchesnokova, M. Billig, D. Dykhuizen, K. Riddell, P. Rogers, X. Qin, S. Butler-Wu, B. T. Cookson, F. C. Fang, D. Scholes, S. Chattopadhyay, and E. Sokurenko.** 2012. High-resolution two-locus clonal typing of extraintestinal pathogenic *Escherichia coli*. *Appl Environ Microbiol* **78**:1353-60.
6. **Diancourt, L., V. Passet, J. Verhoef, P. A. Grimont, and S. Brisse.** 2005. Multilocus sequence typing of *Klebsiella pneumoniae* nosocomial isolates. *J Clin Microbiol* **43**:4178-82.
